# Supplementary material
Source: MDPI journal article supplement (https://www.mdpi.com/2073-4441/11/9/1929)
Supplement: s1 [file s1]

# Acetaminophen removal from water by microalgae and effluent toxicity assessment by the zebrafish embryo bioassay

Carla Escapa<sup>a,b</sup>, Ricardo N. Coimbra<sup>c</sup>, Teresa Neuparth<sup>b</sup>, Tiago Torres<sup>b</sup>, Miguel M. Santos<sup>b,d,\*</sup>, Marta Otero<sup>c,e,\*</sup>

<sup>a</sup> IMARENABIO-Institute of Environment, Natural Resources and Biodiversity, Department of Applied Chemistry and Physics, Universidad de León, Avenida de Portugal s/n, León, Spain

<sup>b</sup> CIMAR/CIIMAR – Interdisciplinary Centre of Marine and Environmental Research, University of Porto, Group of Endocrine disruptors and Emerging contaminants, Av. General Norton de Matos s/n, Porto, Portugal

<sup>c</sup> Department of Environment and Planning, Department of Environment and Planning, University of Aveiro, Campus Universitário de Santiago, Aveiro, Portugal

<sup>d</sup> FCUP – Department of Biology, Faculty of Sciences, University of Porto, Rua do Campo Alegre, Porto, Portugal

<sup>e</sup> CESAM-Centre for Environmental and Marine Studies, Campus Universitário de Santiago, Aveiro, Portugal

\* Correspondence: [santos@ciimar.up.pt](mailto:santos@ciimar.up.pt) (M.M.S.); [marta.otero@ua.pt](mailto:marta.otero@ua.pt) (M.O.)

## CONTENT

|                  |                                                                                                                                                                                                                                                                                   |
|------------------|-----------------------------------------------------------------------------------------------------------------------------------------------------------------------------------------------------------------------------------------------------------------------------------|
| <b>Figure S1</b> | Periods of the embryo development of <i>Danio rerio</i> : (a,b) gastrula period; (c,d) pharyngula period; (e,f) larval stage. Note: Sketches have been taken from Kimmel et al. [28] and pictures from the microscope.                                                            |
| <b>Table S1</b>  | Effects on zebrafish embryo exposed to effluents from microalgae treatments at a 1:3 dilution with freshwater. Note: Mean results (n= 12 for control; n=6 exposed groups) are shown together with SE. Results significantly different from control ( $p \leq 0.05$ ) are in bold. |

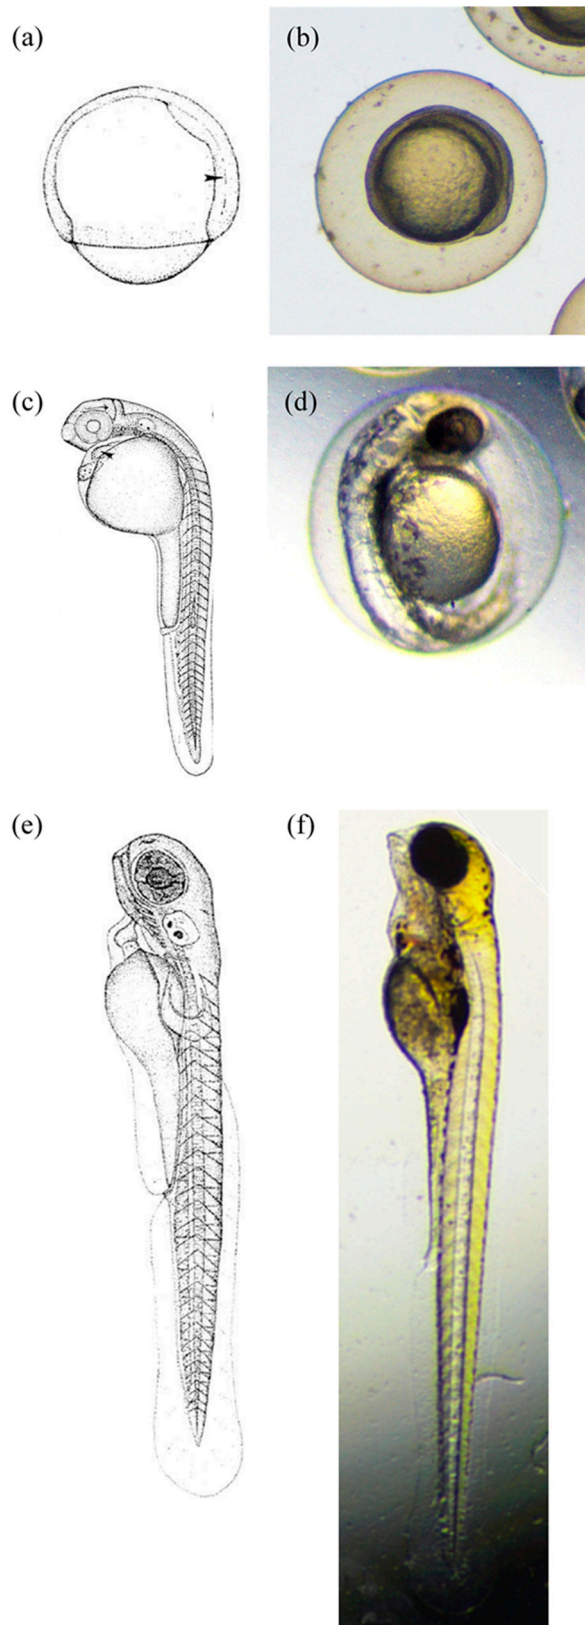

**Figure S1.** Periods of the embryo development of *Danio rerio*: (a,b) gastrula period; (c,d) pharyngula period; (e,f) larval stage. Note: Sketches have been taken from Kimmel et al. [28] and pictures from the microscope.

**Table S1.** Effects on zebrafish embryo exposed to effluents from microalgae treatments at a 1:3 dilution with freshwater. Note: Mean results (n= 12 for control; n=6 exposed groups) are shown together with SE. Results significantly different from control ( $p \leq 0.05$ ) are in bold.

|         |         | Mortality rate | 75%-epiboly rate |  | Total abnormalities |  | Developmental delay |  | Lack of pigmentation |  | Excess of pigmentation |  | Lateral position | Involuntary movements | Larval length ( $\mu\text{m}$ ) |
|---------|---------|----------------|------------------|--|---------------------|--|---------------------|--|----------------------|--|------------------------|--|------------------|-----------------------|---------------------------------|
| 8 hpf   | Control | 1.7 $\pm$ 3.9  | 96.6 $\pm$ 5.1   |  | 1.8 $\pm$ 4.1       |  | 1.8 $\pm$ 4.1       |  |                      |  |                        |  |                  |                       |                                 |
|         | CS      | 3.3 $\pm$ 5.2  | 96.7 $\pm$ 5.2   |  | 0.0 $\pm$ 0.0       |  | 0.0 $\pm$ 0.0       |  |                      |  |                        |  |                  |                       |                                 |
|         | CV      | 3.3 $\pm$ 5.2  | 93.3 $\pm$ 5.2   |  | 3.3 $\pm$ 5.2       |  | 1.7 $\pm$ 4.1       |  |                      |  |                        |  |                  |                       |                                 |
|         | SO      | 1.7 $\pm$ 4.1  | 98.3 $\pm$ 4.1   |  | 0.0 $\pm$ 0.0       |  | 0.0 $\pm$ 0.0       |  |                      |  |                        |  |                  |                       |                                 |
| 32 hpf  | Control | 3.3 $\pm$ 4.9  |                  |  | 0.0 $\pm$ 0.0       |  | 0.0 $\pm$ 0.0       |  | 0.0 $\pm$ 0.0        |  | 0.0 $\pm$ 0.0          |  |                  |                       |                                 |
|         | CS      | 5.0 $\pm$ 5.5  |                  |  | 7.5 $\pm$ 5.8       |  | 0.0 $\pm$ 0.0       |  | 7.5 $\pm$ 5.8        |  | 0.0 $\pm$ 0.0          |  |                  |                       |                                 |
|         | CV      | 5.2 $\pm$ 5.7  |                  |  | 12.4 $\pm$ 3.7      |  | 0.0 $\pm$ 0.0       |  | 12.4 $\pm$ 3.7       |  | 0.0 $\pm$ 0.0          |  |                  |                       |                                 |
|         | SO      | 3.3 $\pm$ 5.2  |                  |  | 10.4 $\pm$ 6.4      |  | 0.0 $\pm$ 0.0       |  | 10.4 $\pm$ 6.4       |  | 0.0 $\pm$ 0.0          |  |                  |                       |                                 |
| 80 hpf  | Control | 4.2 $\pm$ 5.1  |                  |  | 0.9 $\pm$ 3.2       |  | 0.0 $\pm$ 0.0       |  | 0.0 $\pm$ 0.0        |  | 0.0 $\pm$ 0.0          |  |                  |                       |                                 |
|         | CS      | 6.7 $\pm$ 5.2  |                  |  | 9.5 $\pm$ 4.7       |  | 0.0 $\pm$ 0.0       |  | 0.0 $\pm$ 0.0        |  | 5.6 $\pm$ 6.1          |  |                  |                       |                                 |
|         | CV      | 5.0 $\pm$ 5.5  |                  |  | 16.1 $\pm$ 6.0      |  | 0.0 $\pm$ 0.0       |  | 0.0 $\pm$ 0.0        |  | 16.1 $\pm$ 6.0         |  |                  |                       |                                 |
|         | SO      | 3.3 $\pm$ 5.2  |                  |  | 10.4 $\pm$ 6.4      |  | 0.0 $\pm$ 0.0       |  | 0.0 $\pm$ 0.0        |  | 8.5 $\pm$ 7.6          |  |                  |                       |                                 |
| 144 hpf | Control | 4.2 $\pm$ 5.1  |                  |  | 0.9 $\pm$ 3.2       |  | 0.0 $\pm$ 0.0       |  | 0.0 $\pm$ 0.0        |  | 0.0 $\pm$ 0.0          |  | 0.0 $\pm$ 0.0    | 0.0 $\pm$ 0.0         | 3856.88 $\pm$ 45.84             |
|         | CS      | 6.7 $\pm$ 5.2  |                  |  | 26.9 $\pm$ 5.2      |  | 0.0 $\pm$ 0.0       |  | 0.0 $\pm$ 0.0        |  | 25.0 $\pm$ 4.3         |  | 0.0 $\pm$ 0.0    | 0.0 $\pm$ 0.0         | 3869.60 $\pm$ 28.80             |
|         | CV      | 5.0 $\pm$ 5.5  |                  |  | 37.2 $\pm$ 6.1      |  | 0.0 $\pm$ 0.0       |  | 0.0 $\pm$ 0.0        |  | 37.2 $\pm$ 6.1         |  | 1.9 $\pm$ 4.5    | 0.0 $\pm$ 0.0         | 3890.21 $\pm$ 22.28             |
|         | SO      | 3.3 $\pm$ 5.2  |                  |  | 29.3 $\pm$ 6.2      |  | 0.0 $\pm$ 0.0       |  | 0.0 $\pm$ 0.0        |  | 29.3 $\pm$ 6.2         |  | 0.0 $\pm$ 0.0    | 0.0 $\pm$ 0.0         | 3911.49 $\pm$ 17.80             |
